# Supplementary material
Source: PubMed Central journal article supplement (PMC1815244)

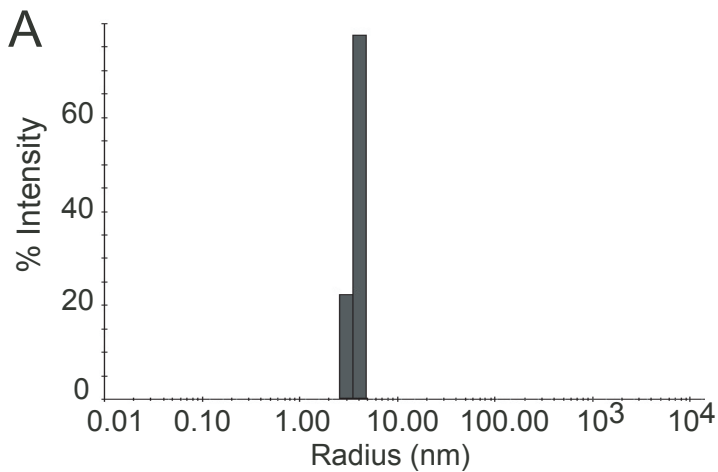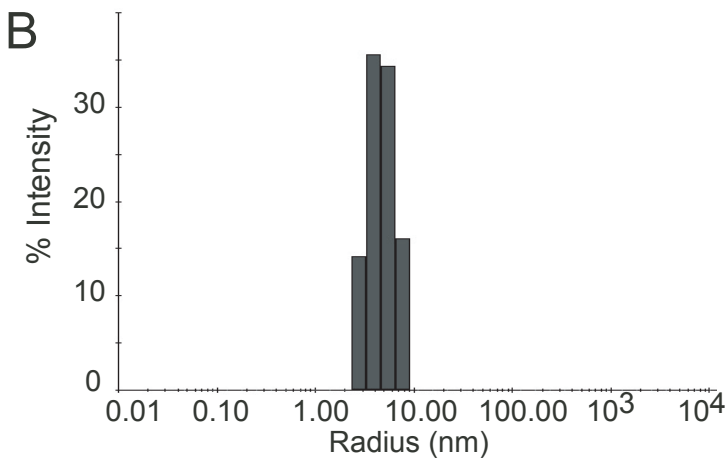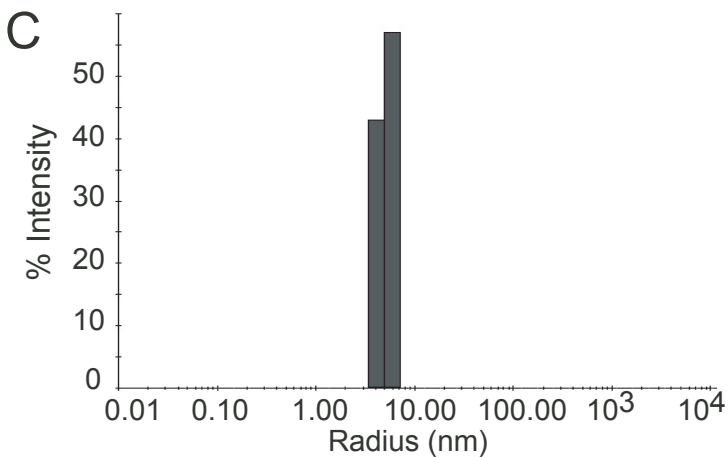

Supplement: pnas_0611318104_1.pdf [file pnas_0611318104_1.pdf]

kDa

66—

55—

36—

31—

21—

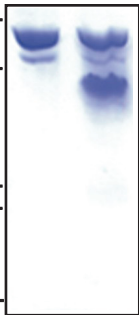

Munc18-1

SNARE complex<sup>2-253</sup>

Syntaxin 1A<sup>2-253</sup>

Supplement: pnas_0611318104_2.pdf [file pnas_0611318104_2.pdf]
